# Supplementary material for: A Smartphone Colorimetric Sensor Based on Pt@Au Nanozyme for Visual and Quantitative Detection of Omethoate
Source: MDPI journal article supplement (doi:10.3390/foods11182900), 2022-09-18
Supplement: s1 [file s1]

# A Smartphone Colorimetric Sensor Based on Pt@Au Nanozyme for Visual and Quantitative Detection of Omethoate

Biao Zhang <sup>1,\*</sup>, Ruofan Zhou <sup>1</sup>, Huiqi Zhang <sup>1</sup>, Danfeng Cai <sup>1</sup>, Xiaodong Lin <sup>2</sup>, Yihan Lang <sup>1</sup>, Yulou Qiu <sup>1</sup>, Xuping Shentu <sup>1</sup>, Zihong Ye <sup>1</sup> and Xiaoping Yu <sup>1</sup>

<sup>1</sup> Zhejiang Provincial Key Laboratory of Biometrology and Inspection & Quarantine, College of Life Sciences, China Jiliang University, Xueyuan Street, Xiasha Higher Education District, Hangzhou 310018, China

<sup>2</sup> College of Food and Bioengineering, Zhengzhou University of Light Industry, Zhengzhou 450001, China

\* Correspondence: zb@cjl.u.edu.cn; Tel.: +86-136-2219-9129

## Contents

Supplementary experimental method

Table S1    Table S2

Figure S1    Figure S2    Figure S3

### **Development of Indirect Competitive ELISA**

The coating antigen solution (100  $\mu\text{L}/\text{well}$ ) was added into a 96-well plate and incubated at 4  $^{\circ}\text{C}$  overnight. After washing three times with PBST (10 mmol/L PBS with 0.05% Tween-20), the microwells were blocked by addition of the blocking solution (200  $\mu\text{L}/\text{well}$ ) at 37  $^{\circ}\text{C}$  for 1 h. After the microwells were washed, omethoate standard or sample solution (50  $\mu\text{L}/\text{well}$ ) and antibody in PBS (50  $\mu\text{L}/\text{well}$ ) were added into each well, and then the microwell plate was incubated at 37  $^{\circ}\text{C}$  for 1 h. After washing, the HRP-labeled secondary antibody solution (100  $\mu\text{L}/\text{well}$ ) was added into each well and then the microwell plate was incubated at 37  $^{\circ}\text{C}$  for 30 min. After washing again, TMB substrate solution (100  $\mu\text{L}/\text{well}$ ) was added into micro-wells and developed for 15 min at 37  $^{\circ}\text{C}$ . The reaction of each well was stopped by addition of 50  $\mu\text{L}$   $\text{H}_2\text{SO}_4$  (1.25 mol/L). Finally, the absorbance was measured in a plate reader with the test wavelength at 450 nm.

Table S1 Optimal working conditions of ELISA

| factor                                            | omethoate             |
|---------------------------------------------------|-----------------------|
| amount of coating antigen                         | 0.10 µg per well      |
| dilution factor of antibody                       | 1:16000               |
| blocking solution                                 | 0.5% skim milk powder |
| dilution factor of HRP-labeled secondary antibody | 1:10000               |

Table S2 Comparison of sensors for omethoate detection

| Methods               | Linear Range              | Detection Limit       | Selectivity        | Time   | Reference |
|-----------------------|---------------------------|-----------------------|--------------------|--------|-----------|
| Colorimetric          | 1.3-100 $\mu\text{mol/L}$ | 1.3 $\mu\text{mol/L}$ | No                 | 32 min | [1]       |
| Colorimetric          | 0.1-10 $\mu\text{g/mL}$   | 0.1 $\mu\text{g/L}$   | No                 | 12 min | [2]       |
| Visual screening card | 0.1-10 $\mu\text{g/mL}$   | 0.1 $\mu\text{g/L}$   | No                 | 25 min | [3]       |
| SERS                  | 24-500 $\mu\text{mol/L}$  | 24 $\mu\text{mol/L}$  | Reacted to 4 OPs   | 21 min | [4]       |
| Colorimetric          | 0.5-50 $\mu\text{g/L}$    | 0.01 $\mu\text{g/L}$  | Only for omethoate | 20 min | This work |

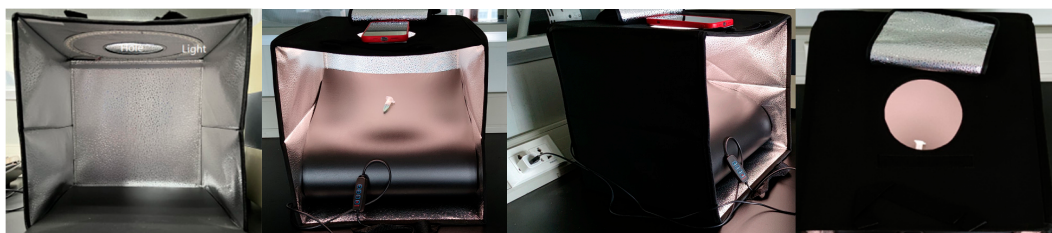

Figure S1 The dark box device diagrams in different locations

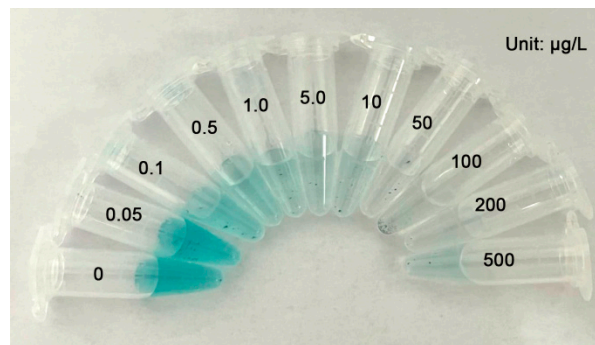

Figure S2 Visual results for the different concentrations of omethoate.

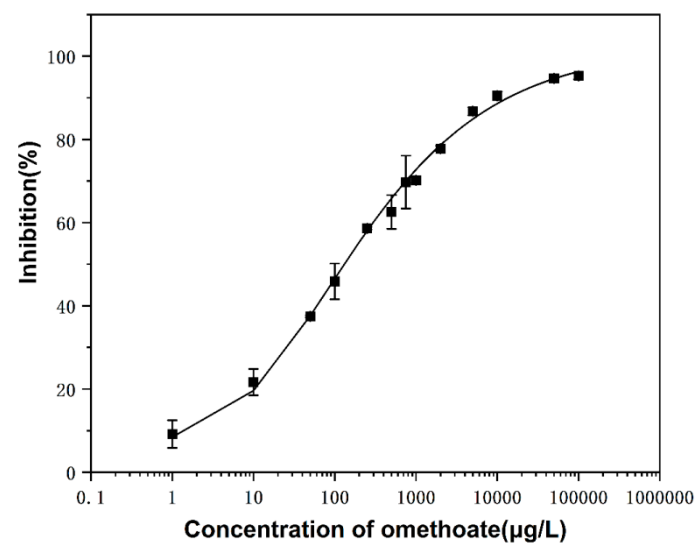

Figure S3 Standard inhibition curve of the ELISA for omethoate in PBS.

## References

1. Oujji NB, Bakas I, Istamboulie G, Ait-Ichou I, Ait-Addi E, Rouillon R, Nogue T. Food Control, 2014, 46: 75-80.
2. Han Z, Chi CS, Bai, B, Liu G, Rao QX, Peng SJ, Liu H, Zhao ZH, Zhang DB, Wu AB. Anal Chim Acta, 2012, 720: 126-133.
3. Guo XS, Zhang XY, Cai Q, Shen T, Zhu SM. Food Control, 2013, 30:15-23.
4. Pang S, Labuza TP, He L. Analyst, 2014, 139: 1895-1901.
